# Supplementary material
Source: HighWire-hosted journal article supplement (https://jnm.snmjournals.org/highwire/filestream/94662/field_highwire_adjunct_files/0/144253_Supplemental_Data.pdf)
Supplement: 144253_Supplemental_Data.pdf [file 144253_Supplemental_Data.pdf]

Supplemental Figure 1: Mean Values of Overlap Indices for Various SUV<sub>max</sub> Thresholds

| Indices | A <sub>30</sub> | A <sub>40</sub> | A <sub>50</sub> | A <sub>60</sub> | A <sub>70</sub> | A <sub>80</sub> | A <sub>90</sub> | A <sub>30</sub> | A <sub>40</sub> | A <sub>50</sub> | A <sub>60</sub> | A <sub>70</sub> | A <sub>80</sub> | A <sub>90</sub> |
|---------|-----------------|-----------------|-----------------|-----------------|-----------------|-----------------|-----------------|-----------------|-----------------|-----------------|-----------------|-----------------|-----------------|-----------------|
|         | B <sub>40</sub> |                 |                 |                 |                 |                 |                 | B <sub>90</sub> |                 |                 |                 |                 |                 |                 |
| Dice    | 0.44            | 0.46            | 0.45            | 0.41            | 0.34            | 0.21            | 0.11            | 0.07            | 0.07            | 0.09            | 0.10            | 0.11            | 0.12            | 0.13            |
| Jaccard | 0.30            | 0.32            | 0.30            | 0.27            | 0.21            | 0.13            | 0.06            | 0.03            | 0.04            | 0.05            | 0.06            | 0.06            | 0.07            | 0.08            |
| OF      | 0.83            | 0.78            | 0.75            | 0.67            | 0.63            | 0.61            | 0.60            | 0.93            | 0.89            | 0.84            | 0.74            | 0.55            | 0.30            | 0.17            |
| A∩B / A | 0.37            | 0.44            | 0.50            | 0.54            | 0.58            | 0.58            | 0.59            | 0.03            | 0.04            | 0.05            | 0.06            | 0.07            | 0.08            | 0.13            |
| A∩B / B | 0.79            | 0.70            | 0.60            | 0.45            | 0.30            | 0.17            | 0.08            | 0.93            | 0.89            | 0.82            | 0.74            | 0.55            | 0.30            | 0.15            |
|         | C <sub>40</sub> |                 |                 |                 |                 |                 |                 | C <sub>90</sub> |                 |                 |                 |                 |                 |                 |
| Dice    | 0.43            | 0.42            | 0.40            | 0.33            | 0.25            | 0.14            | 0.06            | 0.05            | 0.06            | 0.07            | 0.09            | 0.11            | 0.11            | 0.12            |
| Jaccard | 0.29            | 0.28            | 0.26            | 0.21            | 0.15            | 0.08            | 0.03            | 0.03            | 0.03            | 0.04            | 0.05            | 0.06            | 0.07            | 0.08            |
| OF      | 0.72            | 0.70            | 0.66            | 0.62            | 0.61            | 0.58            | 0.56            | 0.93            | 0.81            | 0.75            | 0.61            | 0.51            | 0.25            | 0.15            |
| A∩C / A | 0.38            | 0.46            | 0.51            | 0.53            | 0.55            | 0.53            | 0.43            | 0.08            | 0.06            | 0.06            | 0.07            | 0.08            | 0.09            | 0.12            |
| A∩C / C | 0.69            | 0.57            | 0.47            | 0.34            | 0.26            | 0.14            | 0.17            | 0.88            | 0.79            | 0.73            | 0.59            | 0.51            | 0.25            | 0.13            |
|         | R <sub>40</sub> |                 |                 |                 |                 |                 |                 | R <sub>90</sub> |                 |                 |                 |                 |                 |                 |
| Dice    | 0.38            | 0.40            | 0.37            | 0.34            | 0.27            | 0.16            | 0.07            | 0.03            | 0.04            | 0.05            | 0.07            | 0.09            | 0.08            | 0.09            |
| Jaccard | 0.25            | 0.26            | 0.25            | 0.21            | 0.17            | 0.10            | 0.04            | 0.01            | 0.02            | 0.03            | 0.04            | 0.05            | 0.04            | 0.05            |
| OF      | 0.67            | 0.65            | 0.62            | 0.64            | 0.67            | 0.67            | 0.70            | 0.84            | 0.81            | 0.75            | 0.68            | 0.56            | 0.27            | 0.16            |
| A∩R / A | 0.36            | 0.42            | 0.48            | 0.56            | 0.64            | 0.67            | 0.70            | 0.01            | 0.02            | 0.03            | 0.04            | 0.05            | 0.05            | 0.07            |
| A∩R / R | 0.62            | 0.53            | 0.44            | 0.33            | 0.21            | 0.11            | 0.05            | 0.84            | 0.81            | 0.75            | 0.68            | 0.56            | 0.27            | 0.16            |

OF = overlap fraction. See “Materials and Methods” for description of overlap indices. Numeric indices refer to threshold (% of SUV<sub>max</sub>) for delineation.
